# Supplementary material for: Invasive Fungal Infection Caused by Magnusiomyces capitatus in an Immunocompromised Pediatric Patient with Acute Lymphoblastic Leukemia in Mexico City: A Case Report
Source: MDPI journal article supplement (doi:10.3390/jof8080851), 2022-08-15
Supplement: s1 [file s1]

**Table S1.** Pairwise levels of identity of *M. capitatus* ENCB-HI-834 with their closely related species, by using of ITS and 28S markers.

| ITS                                                            | 1    | 2    | 3    | 4    | 5    | 6    | 7    | 8    | 9    | 10   | 11   | 12 |
|----------------------------------------------------------------|------|------|------|------|------|------|------|------|------|------|------|----|
| 1. <i>Magnusiomyces capitatus</i> ENCB-HI-834 (MN832904)       |      |      |      |      |      |      |      |      |      |      |      |    |
| 2. <i>Magnusiomyces capitatus</i> H2-5 (KT876611)              | 100  |      |      |      |      |      |      |      |      |      |      |    |
| 3. <i>Magnusiomyces capitatus</i> SGX1001 (MH999810)           | 100  | 100  |      |      |      |      |      |      |      |      |      |    |
| 4. <i>Magnusiomyces capitatus</i> Dmin 164990 (MG241530)       | 100  | 100  | 100  |      |      |      |      |      |      |      |      |    |
| 5. <i>Magnusiomyces capitatus</i> H4-3 (KT876612)              | 100  | 100  | 100  | 100  |      |      |      |      |      |      |      |    |
| 6. <i>Yarrowia lipolytica</i> CBS 6124 (NR111212)              | 56   | 56   | 56   | 56   | 56   |      |      |      |      |      |      |    |
| 7. <i>Candida phangngaensis</i> ATCC MYA4467 (NR111357)        | 57.1 | 57.1 | 57.1 | 57.1 | 57.1 | 78   |      |      |      |      |      |    |
| 8. <i>Groenewaldozyma salmanticensis</i> MUCL 29881 (NR111299) | 65   | 65   | 65   | 65   | 65   | 57   | 64   |      |      |      |      |    |
| 9. <i>Debaryomyces hansenii</i> JCM 1990 (NR120016)            | 59.2 | 59.2 | 59.2 | 59.2 | 59.2 | 55.5 | 60.4 | 66.4 |      |      |      |    |
| 10. <i>Clavispora lusitaniae</i> CBS 6936 (NR130677)           | 59.6 | 59.6 | 59.6 | 59.6 | 59.6 | 65.3 | 71.1 | 64.7 | 62.3 |      |      |    |
| 11. <i>Lodderomyces elongisporus</i> ATCC 11503 (NR111593)     | 60.5 | 60.5 | 60.5 | 60.5 | 60.5 | 59.2 | 62.5 | 68.4 | 76.6 | 67.1 |      |    |
| 12. <i>Candida orthopsilosis</i> ATCC 96139 (NR130661)         | 63   | 63   | 63   | 63   | 63   | 61.6 | 64.4 | 69.9 | 79.1 | 68.5 | 88.5 |    |

| 28S                                                              | 1    | 2    | 3    | 4    | 5    | 6    | 7    | 8    | 9    | 10   | 11   | 12   |
|------------------------------------------------------------------|------|------|------|------|------|------|------|------|------|------|------|------|
| 1. <i>Magnusiomyces capitatus</i> ENCB-HI-834 (MN833644)         |      |      |      |      |      |      |      |      |      |      |      |      |
| 2. <i>Magnusiomyces capitatus</i> CBS 162.80 (NG055400)          | 100  |      |      |      |      |      |      |      |      |      |      |      |
| 3. <i>Magnusiomyces capitatus</i> CBS 580.82 (KU301175)          | 100  | 100  |      |      |      |      |      |      |      |      |      |      |
| 4. <i>Magnusiomyces capitatus</i> CBS 312.76 (KU301159)          | 100  | 100  | 100  |      |      |      |      |      |      |      |      |      |
| 5. <i>Magnusiomyces capitatus</i> CBS 562.97 (KU301164)          | 100  | 100  | 100  | 100  |      |      |      |      |      |      |      |      |
| 6. <i>Magnusiomyces capitatus</i> CBS 579.82 (KU301174)          | 100  | 100  | 100  | 100  | 100  |      |      |      |      |      |      |      |
| 7. <i>Magnusiomyces capitatus</i> CBS 12994 (KU301154)           | 99.6 | 99.6 | 99.6 | 99.6 | 99.6 | 99.6 |      |      |      |      |      |      |
| 8. <i>Groenewaldozyma salmanticensis</i> NRRL Y-17090 (NG055414) | 70.1 | 70.1 | 70.1 | 70.1 | 70.1 | 70.1 | 69.7 |      |      |      |      |      |
| 9. <i>Yarrowia lipolytica</i> NRRL YB-423 (NG055393)             | 68.6 | 68.6 | 68.6 | 68.6 | 68.6 | 68.6 | 68.2 | 68.6 |      |      |      |      |
| 10. <i>Debaryomyces hansenii</i> NRRL Y-7426 (NG042634)          | 68.4 | 68.4 | 68.4 | 68.4 | 68.4 | 68.4 | 68   | 77.5 | 70.3 |      |      |      |
| 11. <i>Clavispora lusitaniae</i> NRRL Y-11827 (NG055408)         | 67.5 | 67.5 | 67.5 | 67.5 | 67.5 | 67.5 | 67.1 | 72   | 68.2 | 71.7 |      |      |
| 12. <i>Lodderomyces elongisporus</i> ATCC 11503 (NG054825)       | 68.3 | 68.3 | 68.3 | 68.3 | 68.3 | 68.3 | 67.9 | 75.5 | 69.5 | 90.2 | 72   |      |
| 13. <i>Candida orthopsilosis</i> ATCC 96139 (NG054816)           | 67.5 | 67.5 | 67.5 | 67.5 | 67.5 | 67.5 | 67.2 | 74.3 | 68.8 | 90.5 | 72.7 | 96.8 |
